# Supplementary material
Source: Frontiers journal article supplement (https://www.frontiersin.org/articles/163458)
Supplement: Data_Sheet_1.PDF [file Data_Sheet_1.PDF]

## *Supplementary Material*

### **Taxonomic and functional characteristics of microbial communities and their correlation with physicochemical properties of four geothermal springs in Odisha, India**

Jhasketan Badhai<sup>1</sup>, Tarini Shankar Ghosh<sup>2</sup> and Subrata K Das<sup>1\*</sup>

<sup>1</sup>Department of Biotechnology, Institute of Life Sciences, Nalco Square, Bhubaneswar, India

<sup>2</sup>TATA Consultancy Services Limited, Bhubaneswar, India

\*Corresponding author. Mailing address:

Institute of Life Sciences

Department of Biotechnology

Nalco Square, Bhubaneswar 751023 India

E-mail: [subratkdas@hotmail.com](mailto:subratkdas@hotmail.com) / [subrata@ils.res.in](mailto:subrata@ils.res.in)

Phone: (+91) 674 230 3342

Fax: (+91) 674 230 0728

**Supplementary Table 1:** Roche 454 GS-FLX pyrosequencing data.

| Sampling site                                        | HT-1              | TP-2             | TB-3              | AT-4              |
|------------------------------------------------------|-------------------|------------------|-------------------|-------------------|
| <i>Summary of QC-filtered 454 sequenced reads:</i>   |                   |                  |                   |                   |
| Total no. of 454 reads                               | 27,032            | 31,388           | 51,818            | 51,420            |
| No. of high quality reads                            | 26,423            | 30,644           | 50,543            | 49,872            |
| <i>Summary of CD-Hit454 duplicate removal:</i>       |                   |                  |                   |                   |
| No. of unique reads                                  | 25,307            | 29,164           | 48,251            | 47,409            |
| Total sequenced bases                                | 11,589,561        | 13,289,605       | 22,001,653        | 21,803,188        |
| Longest sequence                                     | 727               | 787              | 900               | 867               |
| Shortest sequence                                    | 65                | 65               | 65                | 65                |
| Average length                                       | 458               | 455              | 456               | 459               |
| % GC distribution                                    | 10-85 %           | 10-85 %          | 15-90 %           | 10-85 %           |
| Average % GC content                                 | 57±9%             | 57±11%           | 55±11%            | 55±9%             |
| <i>Taxonomic and Functional assignment of reads:</i> |                   |                  |                   |                   |
| NCBI-Taxonomy matches                                | 15,167<br>(59.9%) | 16,340<br>(56%)  | 27,706<br>(57.4%) | 24,444<br>(51.6%) |
| SEED matches                                         | 7,249<br>(28.6%)  | 6,979<br>(23.9%) | 13,726<br>(28.4%) | 12,841<br>(27.1%) |
| KEGG matches                                         | 9,473<br>(37.4%)  | 9,560<br>(32.8%) | 18,414<br>(38.2%) | 17,213<br>(36.3%) |

**Supplementary Table 2:** Number of sequences obtained for each phylum under the domains Bacteria and Archaea in each microbial community. Values in parentheses represent the relative abundance (%) of given taxa.

| Phylum                      | HT-1         | TP-2         | TB-3         | AT-4         |
|-----------------------------|--------------|--------------|--------------|--------------|
| Actinobacteria              | 103 (0.99)   | 194 (1.86)   | 144 (0.78)   | 169 (1.19)   |
| Aquificae                   | 233 (2.24)   | 0            | 51 (0.28)    | 47 (0.33)    |
| Armatimonadetes             | 229 (2.20)   | 95 (0.91)    | 96 (0.52)    | 47 (0.33)    |
| Bacteroidetes               | 264 (2.54)   | 494 (4.74)   | 477 (2.58)   | 131 (0.92)   |
| Chlorobi                    | 26 (0.25)    | 21 (0.20)    | 32 (0.17)    | 18 (0.13)    |
| Ignavibacteriae             | 104 (1.00)   | 766 (7.35)   | 108 (0.58)   | 33 (0.23)    |
| Verrucomicrobia             | 186 (1.79)   | 338 (3.24)   | 662 (3.58)   | 165 (1.16)   |
| Chloroflexi                 | 2831 (27.24) | 1273 (12.21) | 2188 (11.83) | 6450 (45.50) |
| Cyanobacteria               | 90 (0.87)    | 1568 (15.05) | 283 (1.53)   | 145 (1.02)   |
| Deferribacteres             | 22 (0.21)    | 0            | 0            | 20 (0.14)    |
| Deinococcus-Thermus         | 708 (6.81)   | 323 (3.10)   | 620 (3.35)   | 110 (0.78)   |
| Dictyoglomi                 | 10 (0.10)    | 0            | 0            | 41 (0.29)    |
| uncultured bacterium        | 67 (0.64)    | 175 (1.68)   | 100 (0.54)   | 109 (0.77)   |
| Acidobacteria               | 767 (7.38)   | 456 (4.38)   | 824 (4.45)   | 145 (1.02)   |
| Marinimicrobia              | 0            | 20 (0.19)    | 0            | 29 (0.20)    |
| Firmicutes                  | 309 (2.97)   | 308 (2.96)   | 595 (3.22)   | 882 (6.22)   |
| Gemmatimonadetes            | 95 (0.91)    | 19 (0.18)    | 55 (0.30)    | 0            |
| Nitrospirae                 | 235 (2.26)   | 48 (0.46)    | 644 (3.48)   | 1624 (11.46) |
| Planctomycetes              | 106 (1.02)   | 245 (2.35)   | 183 (0.99)   | 66 (0.47)    |
| Proteobacteria              | 2494 (24.00) | 3540 (33.97) | 3270 (17.67) | 1413 (9.97)  |
| Spirochaetes                | 339 (3.26)   | 88 (0.84)    | 35 (0.19)    | 107 (0.75)   |
| Synergistetes               | 0            | 15 (0.14)    | 19 (0.10)    | 23 (0.16)    |
| Thermodesulfobacteria       | 0            | 0            | 21 (0.11)    | 35 (0.25)    |
| Thermotogae                 | 461 (4.44)   | 0            | 43(0.23)     | 829 (5.85)   |
| Acetothermia                | 385 (3.70)   | 13 (0.12)    | 6849 (37.02) | 264 (1.86)   |
| Aminicenantes               | 34 (0.33)    | 42 (0.40)    | 164 (0.89)   | 39 (0.28)    |
| Atribacteria                | 12 (0.12)    | 17 (0.16)    | 90 (0.49)    | 153 (1.08)   |
| Calescamantes               | 0            | 0            | 0            | 28 (0.20)    |
| Candidatus Saccharibacteria | 0            | 13 (0.12)    | 0            | 0            |
| Cloacimonetes               | 0            | 23 (0.22)    | 52 (0.28)    | 112 (0.79)   |
| Fervidibacteria             | 43 (0.41)    | 11 (0.11)    | 55 (0.30)    | 32 (0.23)    |
| Hydrogenedentes             | 38 (0.37)    | 12 (0.12)    | 33 (0.18)    | 56 (0.40)    |
| Latescibacteria             | 0 (0.00)     | 18 (0.17)    | 0            | 18 (0.13)    |
| Poribacteria                | 18 (0.17)    | 21 (0.20)    | 31 (0.17)    | 17 (0.12)    |
| Crenarchaeota               | 21 (0.20)    | 10 (0.10)    | 255 (1.38)   | 185 (1.30)   |
| Euryarchaeota               | 152 (1.46)   | 256 (2.46)   | 393 (2.12)   | 574 (4.05)   |
| Korarchaeota                | 0            | 0            | 20 (0.11)    | 24 (0.17)    |
| Thaumarchaeota              | 11 (0.11)    | 0            | 111 (0.60)   | 37 (0.26)    |

**Supplementary Table 3:** The Partial Least Square regression analysis between the relative abundances of twenty-two major genera as response variables and the twenty-two environmental parameters as the predictor variables. The first sheet contains the correlation coefficients along with their statistical significance (p-values) and the power of the correlation analysis (the power is indicative of how good the correlations are expected to be true).

**Supplementary Table 4:** SEED functional profiles (at the level of categories, subsystems and functional genes) generated from the MEGAN5 classification.

**Supplementary Table 5:** KEGG functional profiles (at the level of individual categories, pathways, and KEGG Orthology identifiers) generated from the MEGAN5 classification.

**Supplementary Table 6:** Distribution of identified genes involved in carbon fixation pathways from the four metagenomes.

67

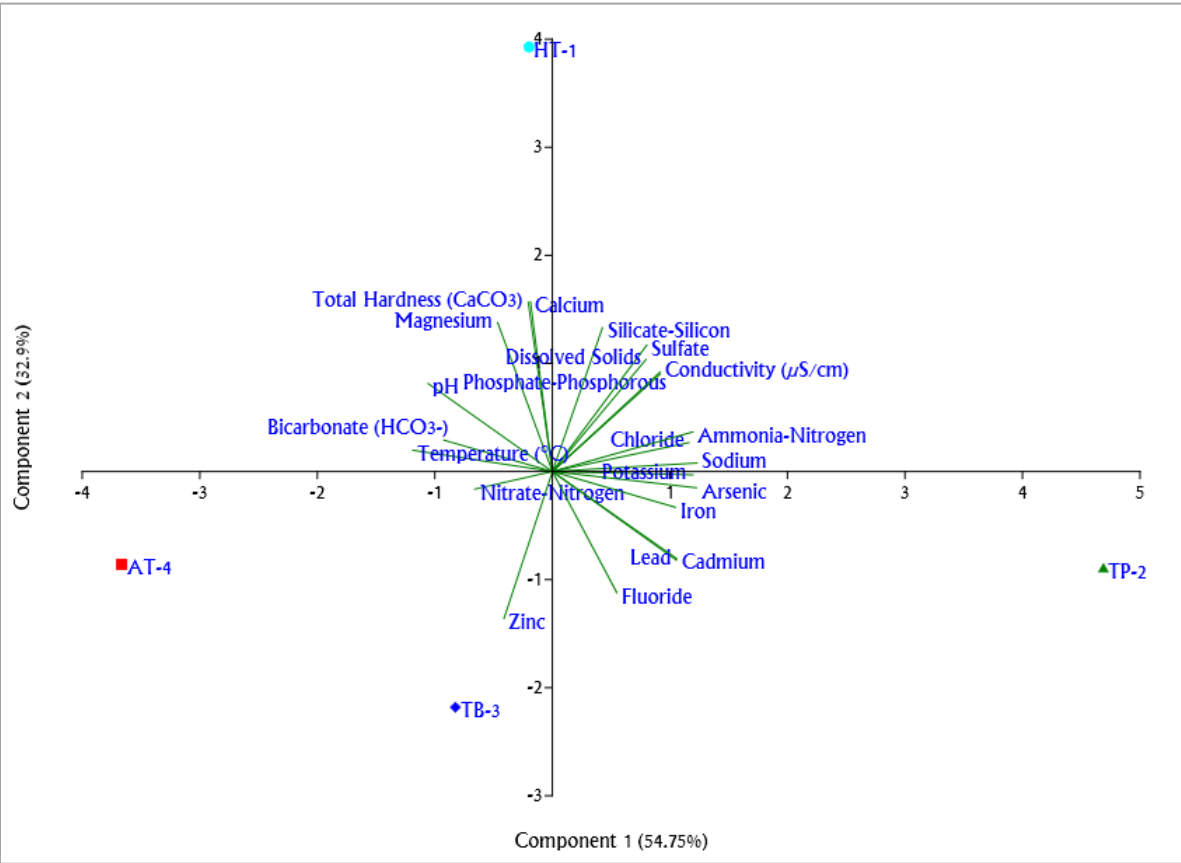

68

69 **Supplementary Figure 1:** Biplot generated for the Principal Component Analysis (PCA) of  
70 twenty two physicochemical variables. Hot springs are shown as colored symbols and  
71 physicochemical variables are represented by green lines.

72

73

74

75

76

77

78

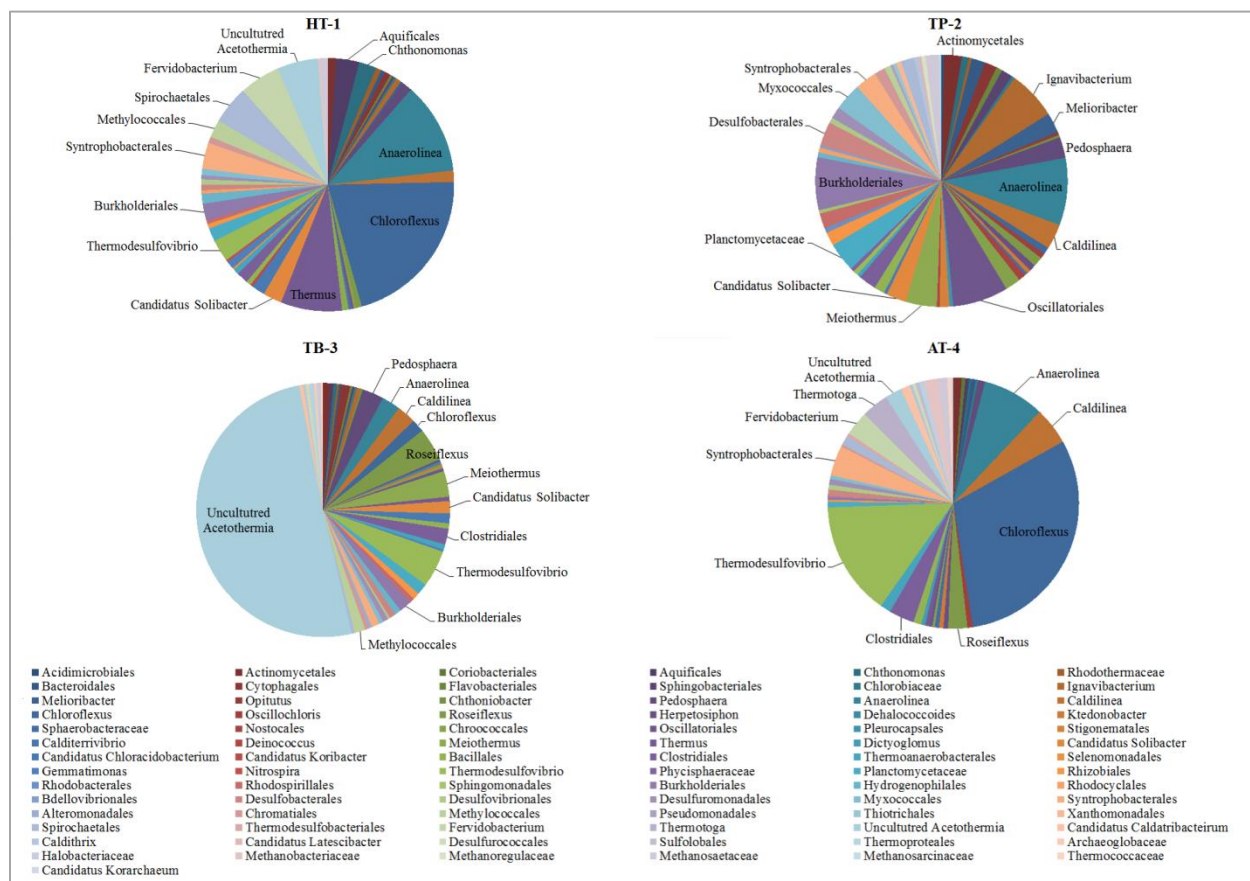

80

**Supplementary Figure 2:** Relative distribution of taxa (below phylum level) belonging to *Bacteria* and *Archaea*. The proportion of phyla is based on MEGAN5 taxonomic classification of the protein-coding sequences in the metagenomes: HT-1 (Athamallik), TP-2 (Taptapani), TB-3 (Tarabalo), and AT-4 (Atri).

85

86

87

88

89

90

91

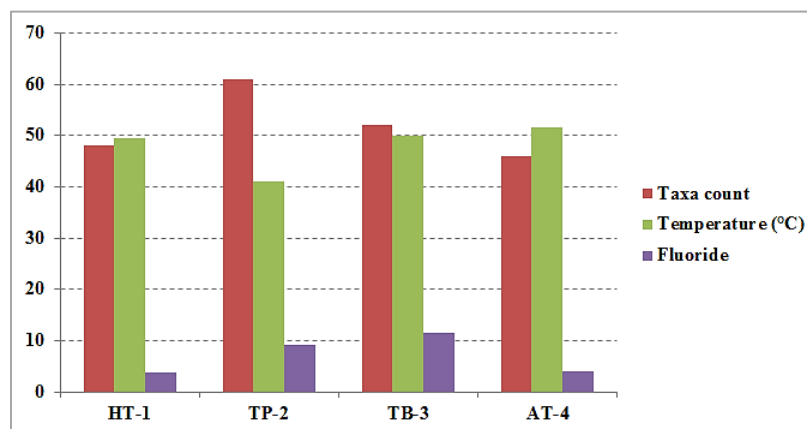

92

93 **Supplementary Figure 3:** Comparison of taxonomic richness with temperature (average) and  
94 aqueous concentration fluoride ions observed in the four hot springs: Athamallik (HT-1),  
95 Taptapani (TP-2), Tarabalo (TB-3) and Atri (AT-4).

96

97

98

99

100

101

102

103

104

105

106

107

108

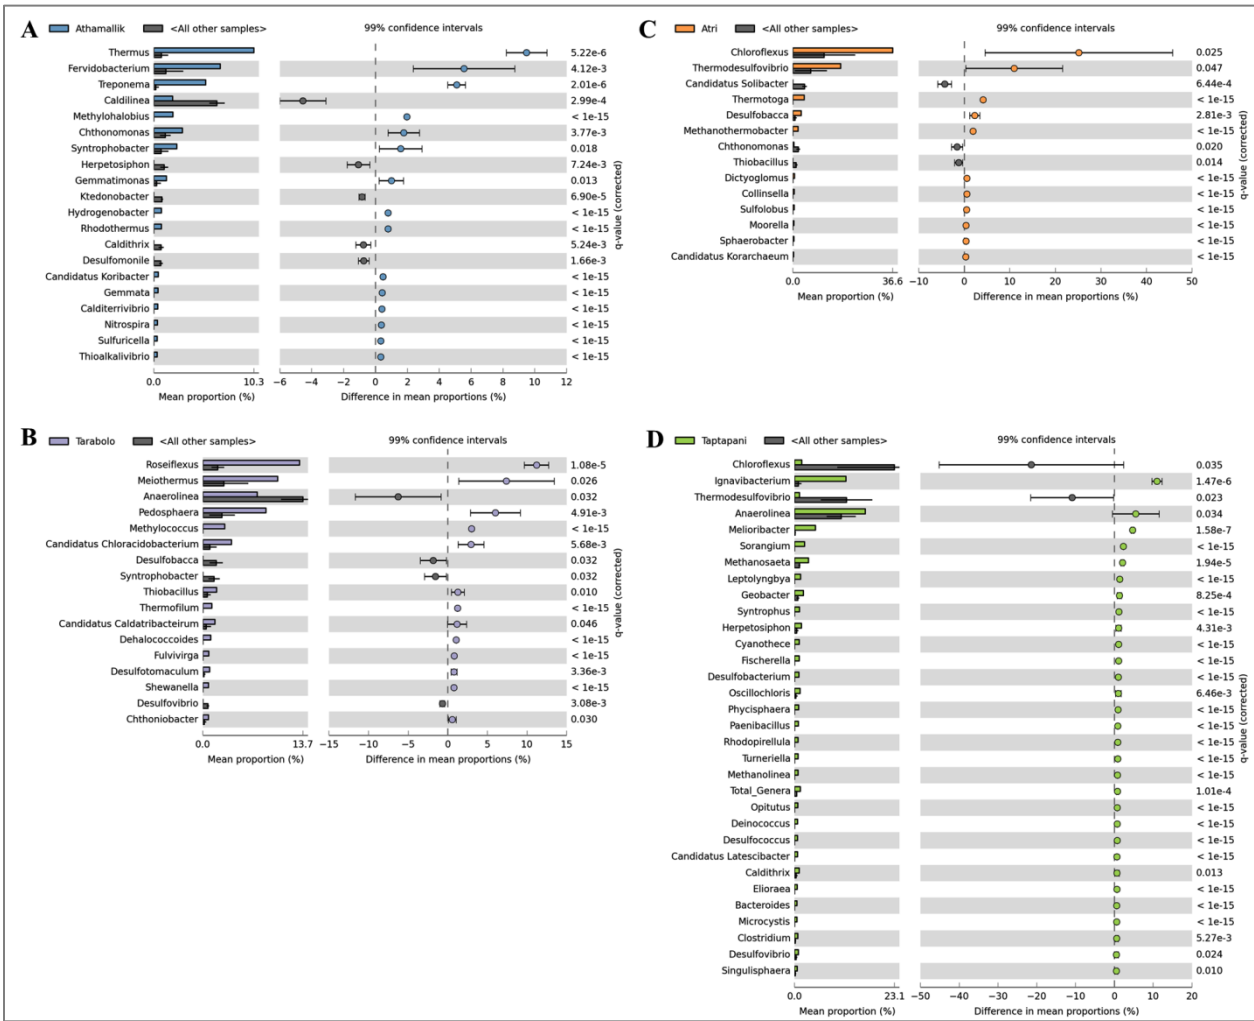

110

111

112

113

114

115

116

117

118

**Supplementary Figure 4:** Extended error bar plot showing genera significantly over-/under-represented in individual sample compared to the other three samples (cumulatively) are shown in (A) Athamallik vs all others, (B) Atri vs all others, (C) Tarabalo vs all others, and (D) Taptapani vs all others, respectively. The difference in proportions and the corrected p-value of significance are also indicated.



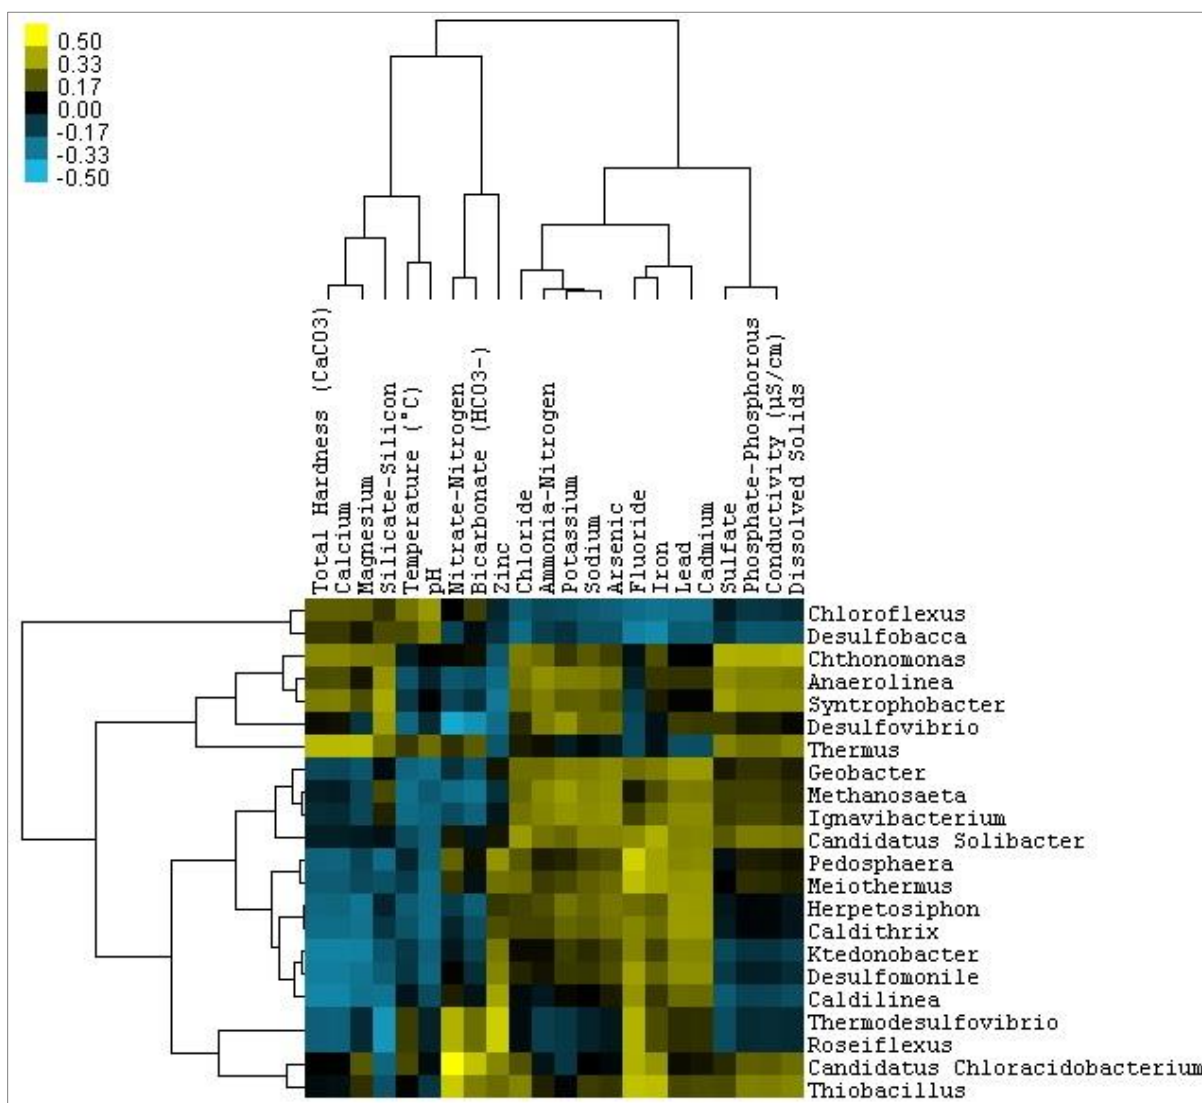

**Supplementary Figure 5:** Partial Least Square (PLS) regression analysis between relative abundances of major genera represented across at least three hot springs and the twenty two physicochemical parameters. The heatmap is based on the regression weights corresponding to the strength of influence an environmental variable has on the relative abundance of a given. Top dendrogram shows the clustering of the physicochemical parameters and side dendrogram shows the clustering of different genera.

128

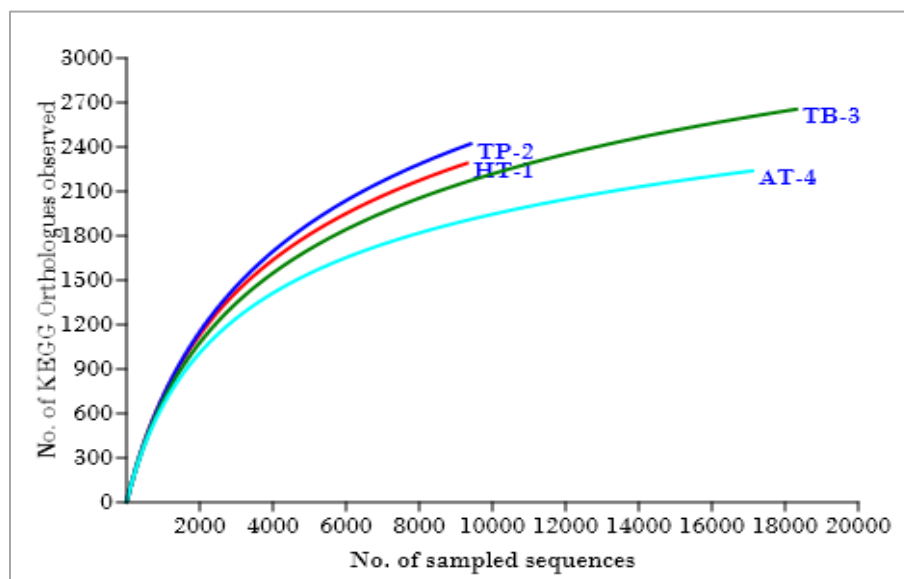

129

130 **Supplementary Figure 6:** Comparison of KEGG functional richness across metagenome  
131 samples based on rarefaction curves of unique KEGG Orthologous identifiers (KO-id) detected  
132 in each metagenome sample.

133

134

135

136

137

138

139

140

141

142

143

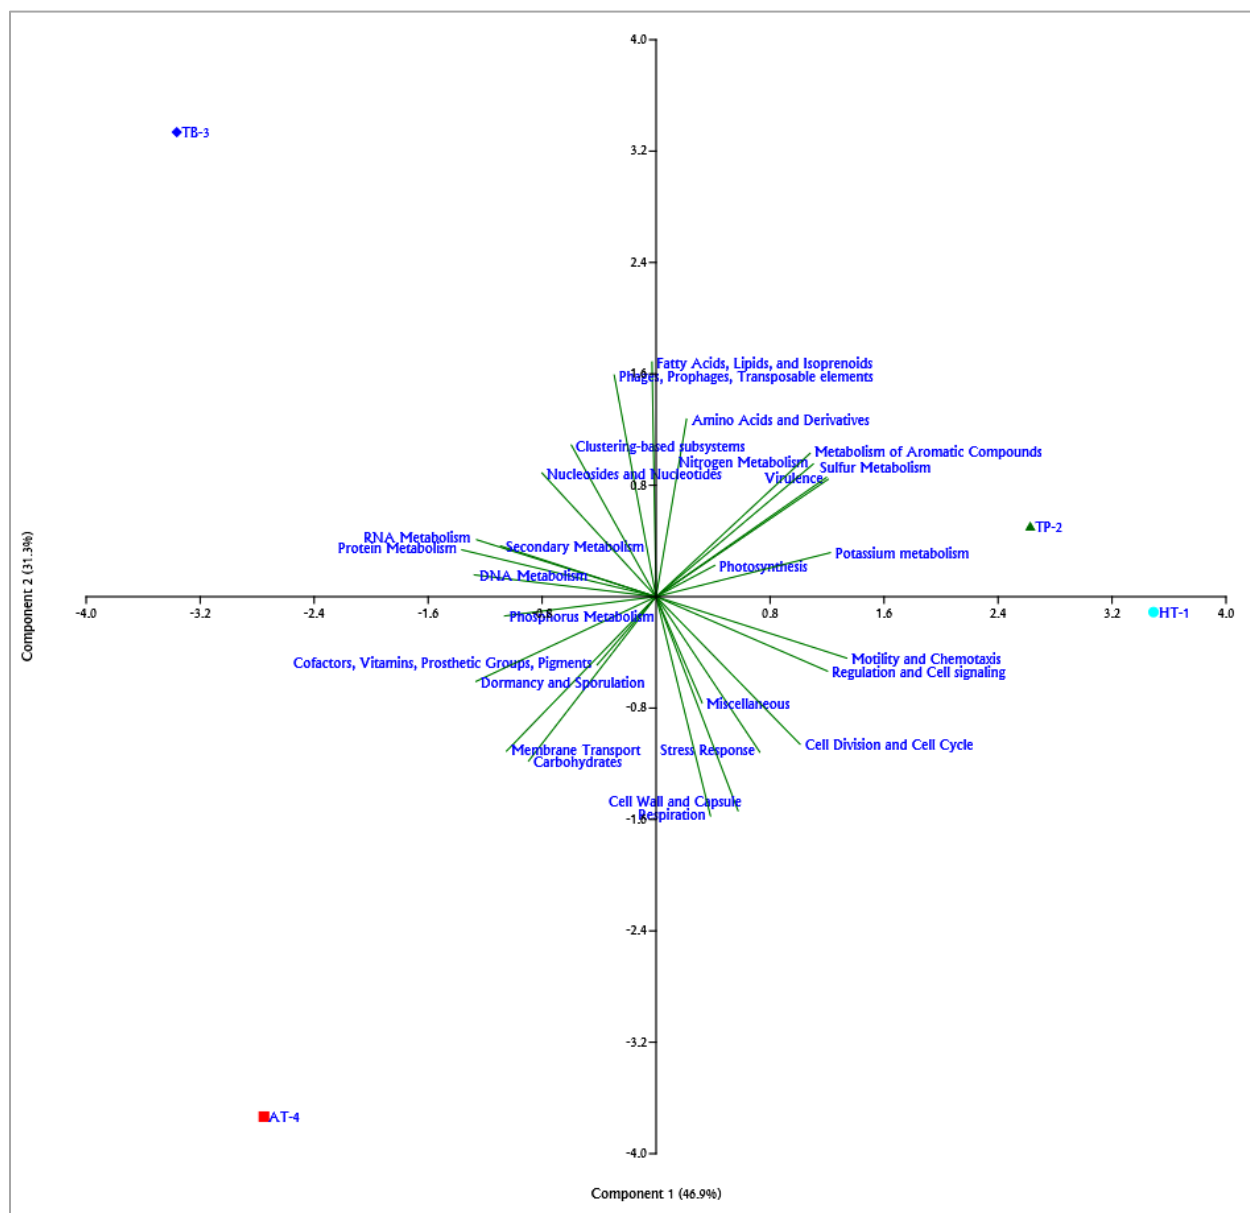

**Supplementary Figure 7:** Biplot generated for the PCA of relative SEED categories represented across at least three hot spring samples. The green lines represent the SEED categories and the hot spring sites are shown as colored symbols.

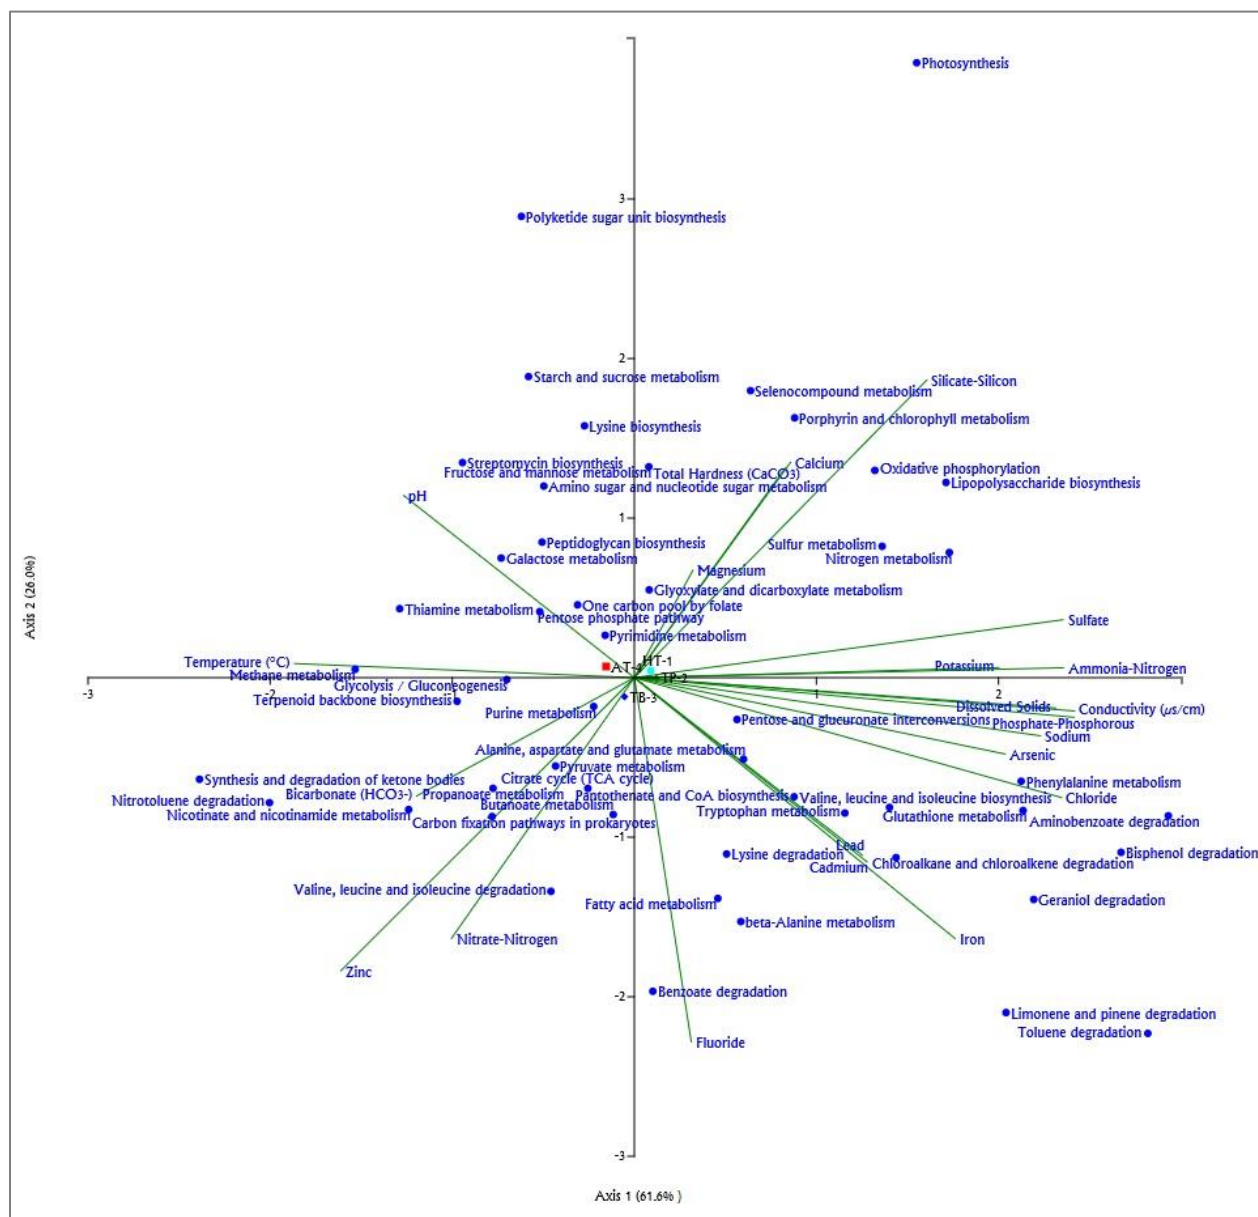

153

154 **Supplementary Figure 8:** Triplot generated for the Canonical Correspondence Analysis (CCA) of  
 155 relative abundance of the top 50 most variable KEGG metabolic pathways (cut-off standard deviation of  
 156 10% within the pathway) and twenty two physicochemical parameters of the hot springs. The  
 157 physicochemical parameters are represented by green lines; the KEGG pathways are shown as filled dots;  
 158 hot springs: Athamallik (HT-1), Taptapani (TP-2), Tarabalo (TB-3) and Atri (AT-4) are shown as colored  
 159 symbols.

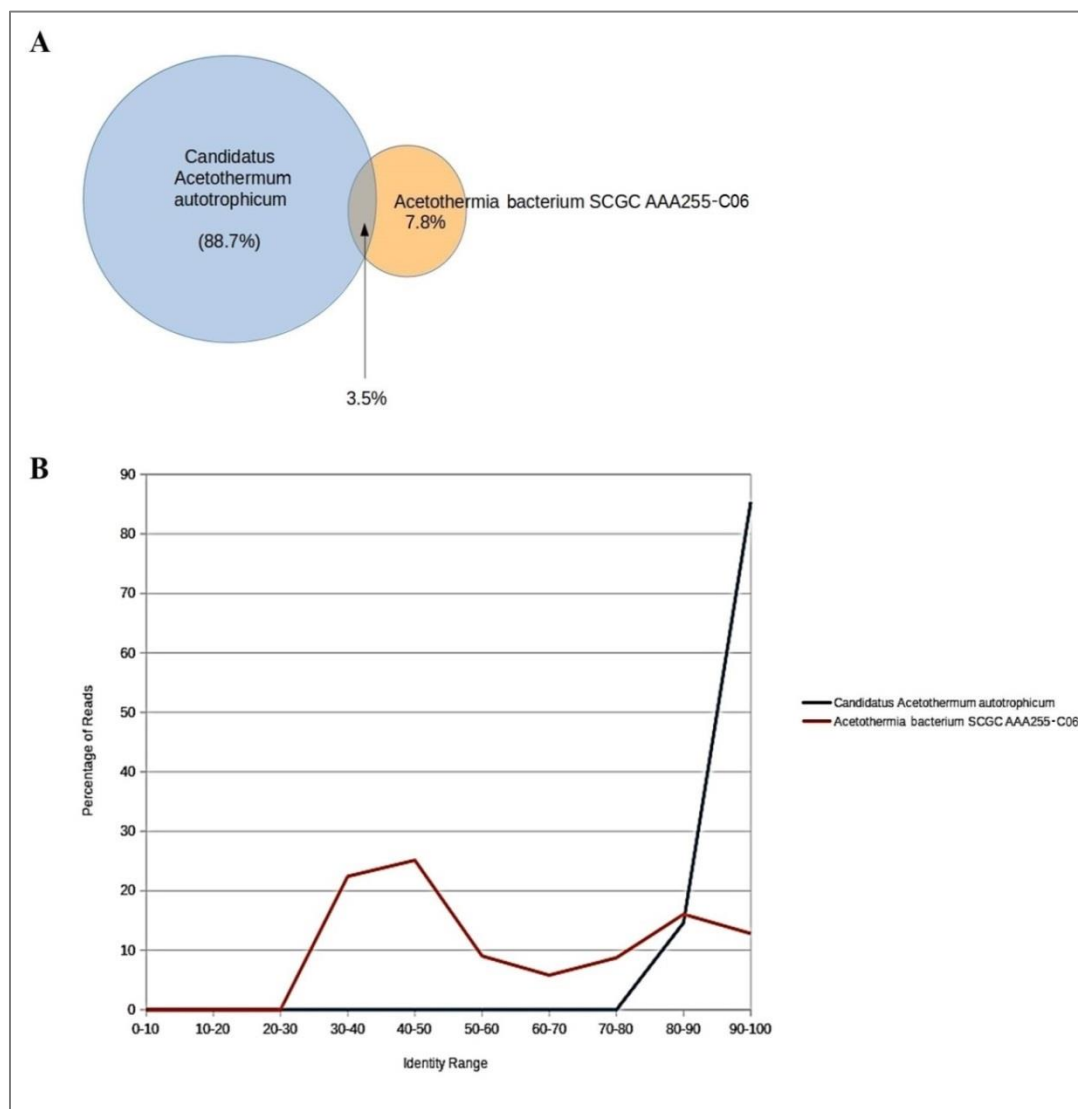

161

162 **Supplementary Figure 9:** Genomic relatedness between the candidate phylum *Acetothermia*  
 163 affiliated read sequences present in the metagenome sample obtained from the spring TB-3 and  
 164 the previously reported genomes of the bacteria “*Ca. Acetothermum autotrophicum*” and  
 165 “*Acetothermia bacterium SCGC AAA255-C06*”. (A) Venn-diagram showing percentage of hits  
 166 to gene in *Acetothermia* sequences (obtained in this study) having matches in the other two  
 167 genomes. (B) Distribution of percentage identities of the gene hits obtained from BLAST  
 168 similarity search against the two published genomes of *Acetothermia* bacteria.
